# THE RECORDING OF SURGICAL AND ANESTHETIC DATA IN TWO ARMY GENERAL HOSPITALS

The Adaptation of Hollerith Punch Cards, Used from July 1, 1941 to December 31, 1943 \*

MAJOR C. P. WANGEMAN AND MAJOR S. J. MARTIN  
*Medical Corps, Army of the United States*

ACCURATELY recorded statistical studies serve as effective instructive forces to both surgeon and physician anesthetist. Statistics are of value in studying anesthetic agents, technics of administration, and complications only when the number of individual cases considered totals in the thousands. A uniform system of collecting data has been provided by the Committee on Records, of the American Society of Anesthetists. This system utilizes a standard code, a definite interpretation of the code (1), and a card which makes possible the rapid mechanical counting of specific items of interest. In 1940, an experiment was undertaken to determine the practicability of using a modified Hollerith punch card for the recording of surgical and anesthetic data in the medical department of the Army (2). The standard code card was modified by printing a commonly used graphic chart on the reverse side of the card. This modification makes possible the preserving of all the preoperative, operative and postoperative information concerning an individual patient on a single, compact, mechanically sortable card. No part of the recording requires individual inspection in order to compile a statistical report because this is mechanically accomplished at the rate of approximately 400 cards per minute by a sorting machine. After trying the method on a few cases, it was concluded that it was practical, that it possessed outstanding advantages for those trained in its use, and that it deserved further study.

During the past two and one half years, the authors, in their respective hospitals, have employed this system of record keeping, in addition to the sheet (Form 55 0-1) now required by the War Department. One hospital is situated on the Pacific Coast and the other is on the Atlantic Seaboard. After the significant information was recorded in code form on the card and the operation of punching completed, the cards were pooled for sorting by a machine, owned by the International Business Machines Corporation, called a Sorter. When this operation was completed a factual, accurate, statistical report was apparent.

It is the purpose of the authors to present a brief review of 4,018 cases from the two hospitals, to illustrate the method of recording

\* Read before the Section on Anesthesiology at the Ninety-Fourth Annual Session of the American Medical Association, Chicago, June 14, 1944.

data, and the type and completeness of the information obtainable. When thousands of cases are involved, unless the punch card system is used, it is impossible to complete such a report without the expenditure of many, many hours of clerical work. It is fully appreciated that a study of a few thousand cases is not of statistical significance, and that no conclusions can be drawn from this report. However, it can serve to show the nature and complications of patients operated upon in these two hospitals. Attention is invited to the fact that if this system were employed by a large number of anesthetists during the present conflict, detailed information of statistical value would be obtainable.

### METHOD

The card and code used is the one described by the Committee on Records of the American Society of Anesthetists in their publication *Interpretations to the Anesthesia Code* (1). The card has the usual anesthetist's graphic chart printed on the reverse side. This card has been previously described in detail (1 and 2) and is shown, before use in its cellulose acetate holder (made from discarded x-ray film) in figure 1.

The purpose of the card holder is to prevent damage to the edges of the card during use in the operating pavilion and wards. The holders can be conveniently carried in a small loose leaf notebook. A damaged card jams and stops the sorting machine; however, once a card has been correctly punched, even though damaged, it can be mechanically reproduced by an Automatic Duplicating Punch. Even the numbers represented by punch holes can be transcribed mechanically on the top border of the card by a machine called an Interpreter. All of these machines are in daily use in the Service Bureau of the International Business Machines offices, located in most cities of this country.

When a patient is scheduled for operation a card is labeled with the proper name, rank, and location (room or ward) in the hospital. In the spaces on the front side of the card, labeled GEOG., an arbitrary number is placed which identifies a given hospital from another. When the operation is completed the sequential case number is written in the spaces opposite CASE NO. On lines 3 to 6, the pertinent preoperative information is recorded. During the operation, or immediately after, the proper code numbers concerning the operative procedure are added. Lines 13 and 14 are reserved for the recording of postoperative complications. The above use of the code has been previously described in detail (1), as well as the detailed use of the graphic chart (2). The next line, beginning ANESTH., is for the individual anesthetist's code number, and this also applies to the following line for the surgeon. If anesthetist and surgeon are recorded by a single digit code number, four columns remain on the card and these may be used to represent hospital treatment or special studies of interest to the surgical staff, using a privately devised code. When it becomes evident on post-operative rounds that a patient has recovered sufficiently so that further

complications are unlikely, the card is marked with a symbol, such as "ok" and is now ready for punching.

Punching may be done at any convenient time with an Electric Key Punch rented from the International Business Machines Corporation.

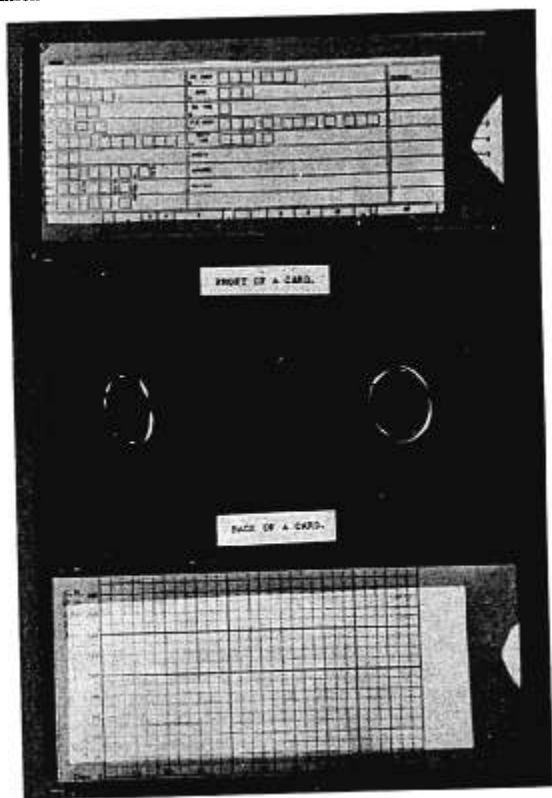

FIG. 1. Modified Hollerith punch card in holder.

tion or by personnel of the I.B.M. Service Bureau who are expert machine operators. Accuracy in coding is essential in order to produce a sortable group of cards. Sorting is entirely a technical procedure and is rapidly accomplished by the Service Bureau's machine operators. The information desired in order to answer statistical questions, of course, must be outlined by the surgeon or anesthetist desiring a report.

The individual sorts required depend on the information requested, and the nature and type of statistical questions to be answered. Some reports may be very elaborate and require complex, multiple sorts for detailed information. Others may only answer the more commonly asked questions, such as how frequently a given agent or technic was used.

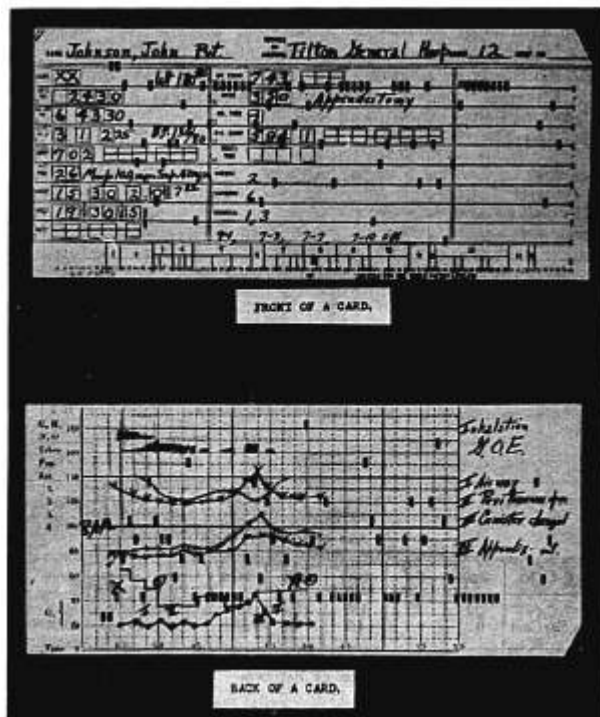

FIG. 2. Completed punched card ready for sorting.

The first nine columns of the card are not used by the American Society of Anesthetists' code and may be utilized to record information of local interest. For use in these columns an individual anesthetist or surgeon may make his own private code, recording any information desired. The code numbers for this purpose should be written opposite numbers one to nine on the extreme right end of the front side of the card. Figure 2 shows a completed card punched and ready for sorting.

## STATISTICAL REPORT

The following detailed report is presented to demonstrate the type and completeness of the information obtainable from the above described record system, used in two General Hospitals of the Army. To conserve paper and space, some of the data incorporated in lengthy tables have been omitted from this publication and only their titles listed, as noted below.

Combinations of Anesthetic Agents

Principal Agent Used for Each Operation

Detailed Study by Region—Premedication

Age, Physical Status Preoperatively, Duration of Anesthesia, Level of Anesthesia, Month and Season

Time of Death—Operation—Morbidity Conditions—Initiating Diseases

## GENERAL INFORMATION

| Principal Anesthetic Agent | Per Cent of Total | Principal Technic of Administration     | Per Cent of Total |
|----------------------------|-------------------|-----------------------------------------|-------------------|
| Ether..... 1463            | 34.1              | Inhalation (Non-endotracheal)..... 1848 | 43.1              |
| Nitrous Oxide..... 420     | 9.7               | Inhalation (Endotracheal)..... 311      | 7.2               |
| Cyclopropane..... 257      | 6.0               | * Rectal Instillations..... 0           | 0.0               |
| Vinethene..... 19          | 0.4               | Intravenous..... 491                    | 11.5              |
| Pentothal..... 482         | 11.1              | Spinals..... 1297                       | 30.3              |
| Other Barbiturates..... 9  | 0.2               | Sacral, Caudal or Both..... 101         | 2.4               |
| Procaine..... 1053         | 24.5              | Field Blocks..... 3                     | 0.07              |
| Metycaine..... 478         | 11.1              | Infiltration..... 104                   | 2.4               |
| Pontocaine..... 89         | 2.6               | Specific Nerve Blocks..... 134          | 3.1               |
| Nupercaine..... 19         | 0.4               |                                         |                   |
| Totals..... 4289           |                   | Totals..... 4289                        |                   |

\* Avertin was used 15 times but not as the principal agent. (Used only as basal.)

## AGE OF PATIENTS

|                     | No Data   | 1-9       | 10-19      | 20-29      | 30-39        | 40-49      | 50-59     | 60-69     | Total |
|---------------------|-----------|-----------|------------|------------|--------------|------------|-----------|-----------|-------|
| Incidence, Per Cent | 22<br>0.5 | 22<br>0.1 | 186<br>4.3 | 2415<br>56 | 1347<br>31.4 | 207<br>4.8 | 80<br>1.8 | 10<br>0.2 | 4289  |

## SEX OF PATIENTS

Males..... 4210

Females..... 79

## PHYSICAL STATUS OF PATIENTS

|                     | No Data   | Good         | Fair       | Poor      | Serious   | Emergency  |           | Morbund   | Total |
|---------------------|-----------|--------------|------------|-----------|-----------|------------|-----------|-----------|-------|
|                     |           |              |            |           |           | Good       | Poor      |           |       |
| Incidence, Per Cent | 33<br>0.7 | 3679<br>85.9 | 278<br>6.4 | 46<br>1.1 | 13<br>0.3 | 200<br>4.6 | 35<br>0.8 | 5<br>0.01 | 4289  |

DETAILED STUDY BY REGION  
PHYSICAL STATUS PREOPERATIVELY

| Region                                | Good                     | Fair | Poor | Se-<br>rious | Emergency |      | Mor-<br>bund | No<br>Data | Total |
|---------------------------------------|--------------------------|------|------|--------------|-----------|------|--------------|------------|-------|
|                                       |                          |      |      |              | Good      | Poor |              |            |       |
| No Operation.....                     | 5                        |      |      |              | 2         |      |              |            | 7     |
| Head and Neck                         | Total for 000 group..... |      |      |              |           |      |              |            |       |
| Head, Superficial.....                | 23                       |      | 1    |              | 6         |      |              |            | 30    |
| Intracranial.....                     | 22                       | 8    | 3    | 1            | 3         | 6    | 3            | 1          | 47    |
| Neck.....                             | 38                       | 3    | 1    |              | 6         | 1    |              |            | 49    |
| Thyroid and Parathyroid.....          | 72                       | 7    | 2    |              |           |      |              | 2          | 83    |
| Ear, Nose and Throat.....             | 118                      | 3    |      | 1            | 4         | 2    |              | 3          | 131   |
| Dental.....                           | 11                       |      |      |              |           |      |              |            | 11    |
| Eye.....                              | 82                       | 2    |      |              | 3         |      |              |            | 87    |
| Thorax                                | Total for 100 group..... |      |      |              |           |      |              |            |       |
| Superficial.....                      | 23                       | 6    |      | 1            | 3         |      |              |            | 33    |
| Extrapleural Operations.....          | 28                       | 14   | 1    | 1            | 2         |      |              | 1          | 47    |
| Intrapleural Operations.....          | 8                        | 11   | 4    | 2            | 3         | 1    |              |            | 29    |
| Heart and Vessel Operations.....      | 1                        | 1    |      |              |           |      |              | 1          | 3     |
| Abdomen Intraperitoneal               | Total for 200 group..... |      |      |              |           |      |              |            |       |
| Gallbladder and Ducts.....            | 33                       | 2    | 1    |              |           |      |              |            | 36    |
| Stomach and Duodenum.....             | 8                        | 6    | 3    | 1            | 2         | 2    |              | 1          | 23    |
| Deep Operations.....                  | 4                        | 6    |      |              |           | 2    | 1            |            | 13    |
| Colon Operations.....                 | 3                        | 5    | 1    |              |           |      |              |            | 9     |
| Miscellaneous, Upper Abdomen.....     | 32                       | 4    | 3    |              | 2         |      |              |            | 41    |
| Appendix and Diverticula.....         | 64                       | 9    | 1    |              | 56        | 3    |              | 1          | 134   |
| Intestinal, Abdominal Wall.....       | 26                       | 13   | 8    | 2            | 3         | 8    |              | 1          | 61    |
| Gynecologic.....                      | 4                        |      |      |              |           |      |              |            | 4     |
| Miscellaneous, Lower Abdomen.....     | 16                       | 4    | 1    |              |           |      |              |            | 21    |
| Abdomen Extraperitoneal               | Total for 300 group..... |      |      |              |           |      |              |            |       |
| Abdomen Extraperitoneal Lower.....    | 19                       | 5    | 2    |              | 1         |      |              | 1          | 28    |
| Abdomen Superficial.....              | 14                       | 5    |      |              | 1         |      |              |            | 20    |
| Inguinal.....                         | 413                      | 14   |      | 1            | 1         |      |              | 3          | 432   |
| Lumbar.....                           | 102                      | 24   | 2    |              |           | 2    | 1            | 1          | 132   |
| Perineum                              | Total for 400 group..... |      |      |              |           |      |              |            |       |
| Anorectal Operations.....             | 176                      | 6    | 1    |              | 4         |      |              | 1          | 188   |
| Genito-Urinary.....                   | 346                      | 21   | 1    |              | 6         |      |              | 3          | 377   |
| Gynecologic.....                      | 15                       | 3    |      |              | 2         |      |              |            | 20    |
| Obstetric.....                        | 1                        |      |      |              |           |      |              |            | 1     |
| Extremities                           | Total for 500 group..... |      |      |              |           |      |              |            |       |
| Superficial.....                      | 210                      | 12   | 2    |              | 15        | 3    |              | 2          | 244   |
| Tendons and Muscles.....              | 136                      | 7    |      |              | 4         |      |              | 1          | 148   |
| Joints.....                           | 437                      | 14   | 1    |              | 4         |      |              | 3          | 495   |
| Bones.....                            | 368                      | 34   | 2    | 1            | 20        | 2    |              | 1          | 428   |
| Amputations and Disarticulations..... | 46                       | 4    | 3    |              | 5         | 3    |              |            | 61    |
| Application Cast, Manipulation.....   | 90                       | 1    |      |              | 35        |      |              |            | 126   |
| Vessel Operations.....                | 6                        | 1    | 1    | 1            |           |      |              |            | 9     |
| Nerve Operations.....                 | 75                       | 3    |      |              |           |      |              | 1          | 79    |
| Others, Unclassifiable.....           | 3                        |      |      |              |           |      |              |            | 3     |
| Spinal Cord and Column                | Total for 600 group..... |      |      |              |           |      |              |            |       |
| Neurologic.....                       | 61                       | 6    |      | 1            |           |      |              | 2          | 70    |
| Orthopedic.....                       | 381                      | 7    |      |              | 2         |      |              | 3          | 393   |
| Therapeutic and Diagnostic            | Total for 700 group..... |      |      |              |           |      |              |            |       |
| Therapeutic.....                      | 58                       | 6    | 1    |              | 3         |      |              |            | 64    |
| Diagnostic.....                       | 69                       | 1    |      |              | 2         |      |              |            | 72    |
|                                       | Total for 800 group..... |      |      |              |           |      |              |            |       |
| Grand Totals.....                     | 3679                     | 278  | 46   | 13           | 200       | 35   | 5            | 33         | 4289  |
| Per Cent of Total.....                | 85.9                     | 6.4  | 1.1  | 0.3          | 4.6       | 0.8  | 0.01         | 0.7        |       |

## DETAILED STUDY OF AGENT ADMINISTERED

|                          |                            | Technics                  |                               |
|--------------------------|----------------------------|---------------------------|-------------------------------|
| Inhalation<br>2259 cases | Ether<br>1463 cases        |                           | 126 Abs. Circ. Endotracheal   |
|                          |                            |                           | 7 Abs. Circ. Pos. Pressure    |
|                          |                            |                           | 2 Abs. Circ. Control Resp.    |
|                          |                            |                           | 692 Absorption in Circuit     |
|                          |                            |                           | 827 Total                     |
|                          |                            | Circle Absorption.....    | 65 To and Fro Endotracheal    |
|                          |                            |                           | 3 To and Fro Pos. Pressure    |
|                          |                            |                           | 6 To and Fro Control Resp.    |
|                          |                            |                           | 97 Absorption To and Fro      |
|                          |                            | To and Fro Abs. ....      | 171 Total                     |
| Inhalation<br>2259 cases | Nitrous Oxide<br>420 cases |                           | 5 Semi-closed, Endotracheal   |
|                          |                            |                           | 4 Semi-closed                 |
|                          |                            |                           | 9 Total                       |
|                          |                            | Semiclosed.....           | 47 Open Drop Endotracheal     |
|                          |                            |                           | 396 Open Drop                 |
|                          |                            |                           | 13 Pharyngeal Insufflation    |
|                          |                            |                           | 456 Total                     |
|                          |                            | Open.....                 | 2 Abs. Circ. Endotracheal     |
|                          |                            |                           | 5 Abs. Circ. Pos. Pressure    |
|                          |                            |                           | 259 Absorption in Circuit     |
| Inhalation<br>2259 cases | Cyclopropane<br>257 cases  |                           | 266 Total                     |
|                          |                            | Circle Absorption.....    | 1 To and Fro Endotracheal     |
|                          |                            |                           | 39 Absorption To and Fro      |
|                          |                            | To and Fro Abs.....       | 40 Total                      |
|                          |                            |                           | 80 Total                      |
|                          |                            | Semiclosed.....           | 34 Pharyngeal Insufflation    |
|                          |                            |                           | 3 Abs. Circ. Endotracheal     |
|                          |                            | Open.....                 | 6 Absorption in Circuit       |
|                          |                            |                           | 9 Total                       |
|                          |                            | Circle Absorption.....    | 46 To and Fro Endotracheal    |
| Intravenous<br>491 cases | Vinethene<br>19 cases      |                           | 4 To and Fro Control Resp.    |
|                          |                            |                           | 195 Absorption To and Fro     |
|                          |                            |                           | 245 Total                     |
|                          |                            | To and Fro Abs.....       | 3 Insuffl. Pharyngeal Total   |
|                          |                            |                           | 19 Total                      |
|                          |                            | Open.....                 | 201 Without Ephedrine Sulfate |
|                          | Pentothal<br>482 cases     |                           | 598 With Ephedrine Sulfate    |
|                          |                            |                           | 5 With other Adrenergic Drug  |
|                          |                            |                           | 30 Continuous Spinals         |
|                          |                            |                           | 834 Total                     |
|                          |                            | Spinals.....              | 42 Total                      |
| Intravenous<br>491 cases | Sombutal<br>8 cases        |                           | 2 Total                       |
|                          |                            |                           | 137 Total                     |
|                          |                            | Field Blocks.....         | 38 Total                      |
|                          |                            |                           | 151 Without Ephedrine Sulfate |
|                          |                            | Infiltration.....         | 203 With Ephedrine Sulfate    |
|                          |                            |                           | 1 With other Adrenergic Drug  |
|                          |                            | Specific Nerve Block..... | 1 Continuous Spinal           |
|                          |                            |                           | 356 Total                     |
|                          |                            | Spinal.....               | 65 Total                      |
| Blocks<br>1639 cases     | Procaine<br>1053 cases     |                           | 2 Total                       |
|                          |                            |                           | 6 Total                       |
|                          |                            | Sacral, Caudal, both..... | 6 Total                       |
|                          |                            |                           | 49 Total                      |
|                          |                            | Field Block.....          | 26 Without Ephedrine Sulfate  |
|                          |                            |                           | 59 With Ephedrine Sulfate     |
|                          |                            | Infiltration.....         | 3 With other Adrenergic Drug  |
|                          |                            | Specific Nerve Block..... | 88 Total                      |
|                          |                            |                           | 1 Total                       |
|                          |                            | Spinal.....               | 6 Without Ephedrine Sulfate   |
| Blocks<br>1639 cases     | Metycaine<br>478 cases     |                           | 13 With Ephedrine Sulfate     |
|                          |                            |                           | 19 Total                      |
|                          |                            | Spinal.....               |                               |
|                          |                            |                           |                               |
|                          |                            |                           |                               |
|                          |                            |                           |                               |
|                          |                            |                           |                               |
|                          |                            |                           |                               |
|                          |                            |                           |                               |
|                          |                            |                           |                               |
| Blocks<br>1639 cases     | Pontocaine<br>89 cases     |                           |                               |
|                          |                            |                           |                               |
|                          |                            |                           |                               |
|                          |                            |                           |                               |
|                          |                            |                           |                               |
|                          |                            |                           |                               |
|                          |                            |                           |                               |
|                          |                            |                           |                               |
|                          |                            |                           |                               |
|                          |                            |                           |                               |
| Blocks<br>1639 cases     | Nupercaine<br>19 cases     |                           |                               |
|                          |                            |                           |                               |
|                          |                            |                           |                               |
|                          |                            |                           |                               |
|                          |                            |                           |                               |
|                          |                            |                           |                               |
|                          |                            |                           |                               |
|                          |                            |                           |                               |
|                          |                            |                           |                               |
|                          |                            |                           |                               |

# RECORDING DATA IN ARMY HOSPITALS

71

## DETAILED STUDY OF AGENT ADMINISTERED SPECIFIC NERVE BLOCKS

### Procaine

- 7 Stellate Ganglion Blocks
- 2 Brachial Plexus Blocks
- 7 Lumbar Sympathetic Blocks
- 2 Intercostal Nerve Blocks
- 1 Shoulder Nerve Block
- 7 Lumbar Nerve Block (1 Alcohol)
- 3 Thoracolumbar Nerve Blocks
- 2 Cervical Paravertebral Blocks
- 7 Miscellaneous Nerve Blocks

38 Total

### Metycaine

- 5 Stellate Ganglion Blocks
- 7 Brachial Plexus Blocks
- 28 Lumbar Sympathetic Blocks
- 6 Intercostal Nerve Blocks
- 1 Ulnar Nerve Block
- 1 Lumbar Nerve Block
- 1 Anterior and Posterior Tibial N.B.

49 Total

## SPINAL ANESTHESIA SUPPLEMENTED

|                         | Administrations | Supplemented | Unsupplemented |
|-------------------------|-----------------|--------------|----------------|
| Procaine spinals.....   | 834             | 95           | 739            |
| Metycaine spinals.....  | 356             | 27           | 329            |
| Pontocaine spinals..... | 88              | 18           | 70             |
| Nupercaine spinals..... | 19              | 4            | 15             |
| Total spinals.....      | 1297            | 144          | 1153           |
| Per Cent.....           |                 | 11           | 89             |

## DURATION OF ANESTHESIA

| Agent                   | No Data | 5 Min. | 1 Hr. | 1 Hr. | 1 1/2 Hr. | 2 Hrs. | 3 Hrs. | 4 Hrs. | 5 Hrs. | 6 Hrs. | Total |
|-------------------------|---------|--------|-------|-------|-----------|--------|--------|--------|--------|--------|-------|
| Ether.....              | 5       | 2      | 75    | 388   | 390       | 383    | 203    | 81     | 27     | 9      | 1460  |
| Nitrous Oxide.....      |         | 11     | 185   | 132   | 51        | 29     | 10     | 2      |        |        | 426   |
| Cyclopropane.....       |         | 2      | 40    | 46    | 55        | 54     | 53     | 6      | 1      |        | 257   |
| Vinethene.....          |         | 2      | 17    |       |           |        |        |        |        |        | 19    |
| Pentothal.....          |         | 33     | 295   | 93    | 24        | 17     | 14     | 5      | 1      |        | 482   |
| Other Barbiturates..... |         |        | 9     |       |           |        |        |        |        |        | 9     |
| Procaine.....           | 2       | 4      | 171   | 584   | 175       | 68     | 30     | 14     | 5      |        | 1053  |
| Metycaine.....          |         |        | 60    | 172   | 132       | 65     | 43     | 6      |        |        | 478   |
| Pontocaine.....         |         |        | 2     | 24    | 20        | 30     | 11     | 2      |        |        | 89    |
| Nupercaine.....         |         |        |       |       | 8         | 7      | 4      |        |        |        | 19    |
| Total.....              | 7       | 54     | 854   | 1439  | 855       | 553    | 368    | 116    | 34     | 9      | 4288  |
| Per Cent.....           | 0.1     | 1.3    | 19.9  | 33.6  | 19.9      | 12.9   | 8.6    | 2.7    | 0.8    | 0.1    |       |



## INCIDENCE OF PREOPERATIVE COMPLICATIONS

3077 Patients without any complication before operation  
 1212 Patients with one or more complications before operation

|                                   |                             | Total |
|-----------------------------------|-----------------------------|-------|
| <b>Circulatory System</b>         |                             | 103   |
| 1 Aneurysm, Aortic                | 3 Aur. Fibrillation         |       |
| 1 Aneurysm, Misc.                 | 5 Other Arrhythmia          |       |
| 3 Arterioscl. Gen.                | 9 Hemorrhage, Moderate      |       |
| 9 Phlebitis                       | 5 Hemorrhage, Severe        |       |
| 5 Other Vas. Dis.                 | 8 Tachycardia               |       |
| 1 Endart. Obliterans              | 1 Bradycardia               |       |
| 3 Funct. Capacity 1               | 7 Hypertension              |       |
| 1 Funct. Capacity 11              | 4 Hypotension               |       |
| 8 Ht. Dis. Thyrotoxic             | 1 Shock Traumatic           |       |
| 1 Accid. Div. Imp't Bl. Vessel    | 2 Bl. P. Rise Marked        |       |
| 6 Ht. Dis. Rheumatic              | 1 Ht. Dis. Coronary         |       |
| 6 Ht. Dis. A-Scler. and Hyperten. | 2 Pul. Embolus              |       |
| 4 Ht. Dis. Luetic                 | 1 Ascites                   |       |
| 1 Myocard. Degeneration           | 4 Others, Ht. Dis.          |       |
| 2 Heart Block                     |                             |       |
| <b>Central Nervous System</b>     |                             | 103   |
| 7 Apprehension Marked             | 1 C.N.S. Lues               |       |
| 1 Excitement Marked               | 1 Myelitis, Transverse      |       |
| 12 Neurosis                       | 1 Meningeal Hemorrhage      |       |
| 1 Epilepsy                        | 1 Encephalitis              |       |
| 36 Psychosis                      | 1 Brain Abscess             |       |
| 1 Meningitis                      | 20 Headache                 |       |
| 4 Increased Intracran. Pres.      | 3 Paralysis                 |       |
| 6 Concussion                      | 1 Backache                  |       |
| 5 Skull Fracture                  | 2 Headache Post. Lum. Punc. |       |
| <b>Genitourinary System</b>       |                             | Total |
| 2 Anuria                          | 4 Epidid., Orchitis         |       |
| 1 Azotemia                        | 3 Prostatitis               |       |
| 4 Low Kidney Function             | 9 Albuminuria               |       |
| 5 Pyelitis, Pyelonephr.           | 21 Hydronephrosis           |       |
| 3 Pyelitis, Pyelonephr. TBC       | 4 Reten. Obstr. Moder.      |       |
| 9 Cystitis                        | 5 Reten. Obstr. Severe      |       |
| 4 Hematuria                       | 2 Ruptured Bladder          |       |
| 1 Hypernephroma                   | 1 Chronic Nephritis         |       |
| <b>Blood, Drug and Technical</b>  |                             | Total |
| 1 Leukemia                        | 57 Secondary Anemia Mod.    |       |
| 1 Bl. Dyscrasia, Others           | 7 Secondary Anemia Severe   |       |
| 1 Hemolytic Jaundice              | 69 Leukocytosis             |       |
| 2 Splenomegaly                    | 5 Idiosyncrasy to Drugs     |       |
| 1 Agranulocytosis                 | 309 Previous Operation      |       |
| 8 Syphilis                        |                             | Total |
| <b>Gastrointestinal System</b>    |                             | 131   |
| 3 Perforated Peptic Ulc.          | 1 Gastritis                 |       |
| 4 Peptic Ulc. (not Perf.)         | 1 Diverticulitis            |       |
| 1 Evisceration Intest.            | 1 Pancreatitis              |       |
| 1 Peritonitis Diffuse             | 6 Nausea and Emesis         |       |
| 4 Intest. Obst. Compl., Early     | 10 Jaundice, Slight         |       |
| 3 Intest. Obst. Compl. Late       | 2 Jaundice, Severe          |       |
| 3 Other Lower Obst.               | 66 Acute Appendicitis       |       |
| 3 Choledocholithiasis             | 1 Paralytic Ileus           |       |
| 1 Hepatitis                       | 4 Distention, Mod.          |       |
| 4 Colitis                         | 2 Distention, Severe        |       |

## INCIDENCE OF PREOPERATIVE COMPLICATIONS—Continued

|                                |                                     |              |             |
|--------------------------------|-------------------------------------|--------------|-------------|
| <b>Infections</b>              |                                     | <b>Total</b> | <b>114</b>  |
| 1 Furuncle                     | 6 Cold Abscess                      |              |             |
| 1 Subphrenic Abscess           | 5 Toxemia                           |              |             |
| 72 Wound Inf. Moderate         | 16 Chronic Osteomyelitis            |              |             |
| 9 Wound Inf. Severe            | 1 Otitis Media, Chr.                |              |             |
| 1 Cellulitis                   | 2 Other Abscesses                   |              |             |
| <b>Respiratory</b>             |                                     | <b>Total</b> | <b>395</b>  |
| 27 Upper Resp. Infec. Ac.      | 21 Emphysema                        |              |             |
| 137 Upper Resp. Infec. Recent  | 13 Lung Abscess                     |              |             |
| 46 Upper Resp. Infec. Chronic  | 26 Hist. of Pneumonia               |              |             |
| 26 Cough                       | 4 Other Mechanical Disturbance      |              |             |
| 12 Pharyngitis                 | 22 Empyema                          |              |             |
| 3 Bronchiectasis               | 12 Pleural Effusion                 |              |             |
| 6 Rales at Bases               | 7 Broncho-Pleu. Fist.               |              |             |
| 12 Bronchitis, Chronic         | 2 Broncho-Cut. Fist.                |              |             |
| 4 Bronchial Asthma             | 9 Pul. TBC. Quiescent               |              |             |
| 2 Tracheal Compression         | 4 Pul. TBC. Active                  |              |             |
| <b>Metabolic and Endocrine</b> |                                     | <b>Total</b> | <b>80</b>   |
| 20 Weight loss Marked          | 2 Malignancy Prostate               |              |             |
| 5 Obesity, Marked              | 2 Malignancy Eye                    |              |             |
| 15 Hyperthyroidism, Mod.       | 1 Malignancy Skin                   |              |             |
| 3 Hyperthyroidism, Sec.        | 3 Malignancy Stomach                |              |             |
| 1 Malignancy Esophagus         | 4 Malignancy Colon                  |              |             |
| 1 Malignancy Mouth             | 4 Malignancy Sigmoid                |              |             |
| 1 Malignancy Breast            | 6 Malignancy Rectum                 |              |             |
| 4 Endocrine Dysfunction        | 1 Malignancy Brain                  |              |             |
| 4 Malignancy Kidney            | 1 Malignancy Pancreas               |              |             |
| 2 Malignancy Bladder           |                                     |              |             |
| <b>Grand Total</b>             | <b>Complications (not patients)</b> |              | <b>1458</b> |

## INCIDENCE OF COMPLICATION DURING OPERATION

3353 Patients without any complications during operation  
936 Patients with one or more complications during operation

|                                       |                                         |              |            |
|---------------------------------------|-----------------------------------------|--------------|------------|
| <b>Circulatory System</b>             |                                         | <b>Total</b> | <b>168</b> |
| 1 case of Pulmonary Embolus           | 2 cases of Hypotension                  |              |            |
| 28 cases of Arrhythmia                | 10 cases of Hemorrhage, Moderate        |              |            |
| 10 cases of Shock, Anesthetic         | 5 cases of Hemorrhage, Severe           |              |            |
| 29 cases of Shock, Traumatic          | 63 cases of B.P. Fall, Not Shock        |              |            |
| 1 case of Fibrillation, Aur.          | 11 cases of B.P. Rise, Marked           |              |            |
| 2 cases of Bradycardia                | 1 case of Hypertension.                 |              |            |
| 2 cases of Tachycardia                | 1 case Accid. Div. Imp't Bl. Vessel     |              |            |
| 2 cases of Others, Misc.              |                                         |              |            |
| <b>Central Nervous System</b>         |                                         | <b>Total</b> | <b>66</b>  |
| 9 cases of Apprehension, Marked       | 16 case of Tremor Under Anesthesia      |              |            |
| 30 cases of Excitement, Marked        | 1 case of Muscle Twitching              |              |            |
| 1 case Irrational                     | 1 case of Paresthesia                   |              |            |
| 1 case of Others, Mental              | 1 case of Pain                          |              |            |
| 6 cases of Convulsions                |                                         |              |            |
| <b>Drug and Technical</b>             |                                         | <b>Total</b> | <b>201</b> |
| 4 cases of Overdose Anesthetic        | 11 cases of Difficult Spinal Tap        |              |            |
| 18 cases of Insuff. Premedication     | 11 cases of Poor Functioning Apparatus  |              |            |
| 6 cases of Idiosyncrasy to Drug       | 2 cases of Accid. Extravenous Injection |              |            |
| 3 cases of Overdose of Premed. Drug   | 2 cases of Impotent Drug                |              |            |
| 12 cases of Anesthetic Failure        | 1 Op. Limited Acc't Anesthesia          |              |            |
| 84 cases of Insufficient Relax., Pain | 3 cases of Trauma to Teeth              |              |            |
| 1 Op. Limited Acc't Anes. Method      | 20 cases of Trauma to Lip               |              |            |
| 2 Ops. Limited Acc't Patients Con.    | 3 cases of Trauma to Larynx             |              |            |
| 7 Difficult Intubation, Not Traum.    | 1 case of Trauma to Pharynx             |              |            |
| 3 Traumatic Intub., Not Completed     | 4 cases of Trauma to Eye                |              |            |
| 4 cases of Epistaxis                  | 1 case of Other Limitations             |              |            |

## INCIDENCE OF COMPLICATION DURING OPERATION—Continued

|                                     |                                           |  |       |     |
|-------------------------------------|-------------------------------------------|--|-------|-----|
| Gastrointestinal                    |                                           |  | Total | 286 |
| 64 cases of Nausea                  | 37 cases of N & E during Recovery in O.R. |  |       |     |
| 28 cases of Nausea and Emesis       | 2 cases of Retching                       |  |       |     |
| 35 cases of N & E during Induct.    |                                           |  | Total | 510 |
| Respiratory                         |                                           |  |       |     |
| 11 cases of Coughing                | 5 cases of Apnea, Marked                  |  |       |     |
| 10 cases of Pharyngeal Obstruction  | 15 cases of Respiratory Depression        |  |       |     |
| 2 cases of Cord Paralysis           | 6 cases of Asphyxia                       |  |       |     |
| 249 cases of Laryngospasm, Moderate | 71 cases of Carbon Dioxide Excess         |  |       |     |
| 27 cases of Laryngospasm, Severe    | 36 cases of Excess Mucus                  |  |       |     |
| 6 cases of Other Upper Resp. Obst.  | 13 cases of Hiccup                        |  |       |     |
| 1 case of Accid. Pneumothorax       | 3 Others, Misc. Respiratory               |  |       |     |
| 2 cases of Interostal Paralysis     |                                           |  |       |     |
| 1 case of Tracheal Collapse         |                                           |  |       |     |
| 1 case of Other Mechanical Dist.    |                                           |  |       |     |
| 1 case of Bronchial Asthma          |                                           |  |       |     |
| 1 case of Lower Bronchial Obst.     |                                           |  |       |     |
| 38 cases of Oxygen Want, Moderate   |                                           |  |       |     |
| 11 cases of Oxygen Want, Severe     |                                           |  | Total | 12  |
| Obstetrical                         | 1 case of Other Hemorrhage                |  |       |     |
| 1 case of Baby Premature            | Complications (not Patients)              |  |       | 133 |
| Grand Total                         |                                           |  |       |     |

## INCIDENCE OF POSTOPERATIVE COMPLICATIONS

2351 Patients without any complications after operation  
 1938 Patients with one or more complications after operation

|                                        |                                           |  |       |    |
|----------------------------------------|-------------------------------------------|--|-------|----|
| Circulatory System                     |                                           |  | Total | 33 |
| 4 cases of Pulmonary Embolus           | 14 cases of Tachycardia                   |  |       |    |
| 1 case of Aneurysm, Misc.              | 1 case of Bradycardia                     |  |       |    |
| 1 case of Fibrillation, Aur.           | 1 case of Circulatory Failure             |  |       |    |
| 4 cases of Other Arrhythmia            | 27 cases of Hemorrhage, Mod.              |  |       |    |
| 1 case of Phlebitis                    | 7 cases of Hemorrhage, severe             |  |       |    |
| 8 cases of Shock, Traumatic            | 1 case of Hypertension                    |  |       |    |
| 3 cases of Shock, Anesthetic           |                                           |  |       |    |
| Central Nervous System                 |                                           |  | Total | 61 |
| 21 cases of Excitement, Marked         | 2 cases of Increased Intracran. Pre.      |  |       |    |
| 12 cases Irrational                    | 2 cases of Convulsions                    |  |       |    |
| 6 cases of Psychosis                   | 3 cases of Muscle Twitching               |  |       |    |
| 2 cases of Neurosis                    | 1 case of Paresthesia                     |  |       |    |
| 7 cases of Others, Mental              | 69 cases of Headache                      |  |       |    |
| 109 Headache, Post-Lumb. Punct.        |                                           |  |       |    |
| 27 Backache, Post-Lumb. Punct.         |                                           |  | Total | 22 |
| Genito-Urinary System                  |                                           |  |       |    |
| 244 cases of Single Catheterizations   | 3 cases of Hematuria                      |  |       |    |
| 65 cases of Multiple Catheterizations  | 1 case of Glycosuria                      |  |       |    |
| 1 case of Oliguria                     | 1 case of Urethritis                      |  |       |    |
| 1 case of Incontinence                 | 1 case of Albuminuria                     |  |       |    |
| 4 cases of Cystitis                    | 1 case of Pyelitis, Pyelonephr.           |  |       |    |
| Blood, Drug and Technical              |                                           |  | Total | 9  |
| 4 cases of Anemia, Secondary           | 2 cases of Idiosyncrasy to Drug           |  |       |    |
| 2 cases of Transfusion Reactions       | 1 case of Epistaxis                       |  |       |    |
| Gastrointestinal System                |                                           |  | Total | 57 |
| 3 cases of Peritonitis, Diffuse        | 58 cases of Nausea                        |  |       |    |
| 1 case of Peritonitis, Local           | 498 cases of N & E 12 Hrs. or less P. Op. |  |       |    |
| 1 case of Mesenteric Thrombosis        | 216 cases of N & E 24 Hrs. or less P. Op. |  |       |    |
| 3 cases of Paralytic Ileus             | 35 cases of N & E 2 Days or less P. Op.   |  |       |    |
| 1 case of Intest. Obstruction, Partial | 13 cases of N & E 2 Days or more P. Op.   |  |       |    |
| 2 cases of Jaundice, Slight            | 1 case of Diarrhea                        |  |       |    |
| 1 case of Wound Separation             | 3 cases of Other, G. I. Misc.             |  |       |    |
| 116 cases of Distention, Moderate      |                                           |  |       |    |
| 4 cases of Distention, Severe          |                                           |  |       |    |

## INCIDENCE OF POSTOPERATIVE COMPLICATIONS—Continued

|                                       |                                     |       |      |
|---------------------------------------|-------------------------------------|-------|------|
| Respiratory                           |                                     | Total | 240  |
| 46 cases of Upper Resp. Infec., Acute | 15 cases of Bronchopneumonia        |       |      |
| 5 cases of Laryngitis, Acute          | 23 cases of Pulm. Collapse, Partial |       |      |
| 86 cases of Cough                     | 5 cases of Pulm. Collapse, Massive  |       |      |
| 22 cases of Pharyngitis               | 5 cases of Pleural Effusion         |       |      |
| 5 cases of Bronchitis, Acute          | 3 cases of Pneumothorax             |       |      |
| 4 cases of Pleurisy                   | 3 cases of Oxygen Want, Severe      |       |      |
| 9 cases of Hiccup                     | 3 cases of Bronchial Asthma         |       |      |
| 1 case of Bronchial Obstruction       | 1 case of Oxygen Want, Moderate     |       |      |
| 1 case of Excess Mucus                | 3 cases of Others, Resp. Misc.      |       |      |
| Metabolic and Endocrine               |                                     | Total | 783  |
| 1 case of Starvation                  | 128 cases of Fever above 102        |       |      |
| 1 case of Dehydration, Moderate       | 649 cases of Fever below 102        |       |      |
| 1 case of Acidosis, Diabetic          | 1 case of Thyroid Storm             |       |      |
| 1 case of Endocrine Dysfunction       | 1 case of Tetany                    |       |      |
| Grand Total                           | Complications (not patients)        |       | 2645 |

## POSTOPERATIVE NAUSEA AND EMESIS

## Anesthetic Agent Administered

| Agent                   | Nau-<br>sea<br>Only | Less Than  |            |           | Over<br>2<br>Days | Total | Total<br>Cases | Incidence,<br>Per Cent |
|-------------------------|---------------------|------------|------------|-----------|-------------------|-------|----------------|------------------------|
|                         |                     | 12<br>Hrs. | 24<br>Hrs. | 2<br>Days |                   |       |                |                        |
| Ether.....              | 32                  | 372        | 108        | 14        | 5                 | 531   | 1463           | 35.1                   |
| Nitrous Oxide.....      | 5                   | 37         | 6          | 2         | 3                 | 53    | 420            | 12.6                   |
| Cyclopropane.....       | 1                   | 19         | 40         | 8         | 1                 | 69    | 257            | 26.8                   |
| Vinethene.....          |                     |            | 12         |           |                   | 12    | 19             | 63.2                   |
| Pentothal.....          | 2                   | 6          | 13         |           | 1                 | 22    | 482            | 4.6                    |
| Other Barbiturates..... |                     |            |            |           |                   | 0     | 9              | 0.0                    |
| Procaine.....           | 13                  | 52         | 23         | 6         | 1                 | 95    | 1053           | 9.1                    |
| Metycaine.....          | 4                   | 9          | 11         | 1         | 1                 | 26    | 478            | 5.4                    |
| Pontocaine.....         |                     | 3          | 1          | 3         | 1                 | 8     | 89             | 8.9                    |
| Nupercaine.....         | 1                   |            | 2          | 1         |                   | 4     | 19             | 2.1                    |
| Total.....              | 58                  | 498        | 216        | 35        | 13                | 820   | 4289           | 19.1                   |

## Region of Operation

| Region                                      | Nau-<br>sea<br>Only | Less Than  |            |           | Over<br>2<br>Days | Total | Total<br>Cases | Incidence,<br>Per Cent |
|---------------------------------------------|---------------------|------------|------------|-----------|-------------------|-------|----------------|------------------------|
|                                             |                     | 12<br>Hrs. | 24<br>Hrs. | 2<br>Days |                   |       |                |                        |
| No Operation (000 Group).....               |                     |            |            |           |                   |       | 7              | 0.0                    |
| Head and Neck (100 Group).....              | 3                   | 41         | 43         | 5         | 1                 | 93    | 438            | 21.2                   |
| Thorax (200 Group).....                     | 1                   | 15         | 10         | 1         |                   | 27    | 112            | 24.1                   |
| Abdomen Intraperitoneal (300 Group).....    | 11                  | 53         | 26         | 7         | 3                 | 100   | 342            | 22.2                   |
| Inguinal and Lumbar (400 Group).....        | 9                   | 49         | 19         | 4         | 2                 | 83    | 612            | 13.6                   |
| Perineum (500 Group).....                   | 5                   | 17         | 16         | 2         |                   | 40    | 586            | 6.8                    |
| Extremities (600 Group).....                | 23                  | 280        | 82         | 13        | 5                 | 403   | 1593           | 25.3                   |
| Spinal Cord and Column (700 Group).....     | 6                   | 43         | 20         | 3         | 2                 | 74    | 463            | 16.0                   |
| Therapeutic and Diagnostic (800 Group)..... |                     |            |            |           |                   | 0     | 136            | 0.0                    |
| Total.....                                  | 58                  | 498        | 216        | 35        | 13                | 820   | 4289           | 19.1                   |

**POSTOPERATIVE COMPLICATIONS**  
**POSTOPERATIVE URINARY RETENTION**  
**Anesthetic Agent Administered**

| Agent                   | Catheterization | Total Cases | Incidence Per Cent |
|-------------------------|-----------------|-------------|--------------------|
| Ether.....              | 121             | 1463        | 8.3                |
| Nitrous Oxide.....      | 8               | 420         | 1.9                |
| Cyclopropane.....       | 10              | 257         | 3.9                |
| Vinethene.....          | 3               | 19          | 15.8               |
| Pentothal.....          | 4               | 482         | 0.8                |
| Other Barbiturates..... | 0               | 9           | 0.0                |
| Procaine.....           | 102             | 1053        | 9.7                |
| Metycaine.....          | 41              | 478         | 8.6                |
| Pontocaine.....         | 17              | 89          | 19.1               |
| Nupercaine.....         | 3               | 19          | 15.8               |
| <b>Total.....</b>       | <b>309</b>      | <b>4289</b> | <b>7.2</b>         |

**Region of Operation**

| Region                                      | Catheterization | Total Cases | Incidence Per Cent |
|---------------------------------------------|-----------------|-------------|--------------------|
| No Operation (000 Group).....               | 0               | 7           |                    |
| Head and Neck (100 Group).....              | 8               | 438         | 1.8                |
| Thorax (200 Group).....                     | 0               | 112         | 0.0                |
| Abdomen Intraperitoneal (300 Group).....    | 45              | 342         | 13.2               |
| Inguinal and Lumbar (400 Group).....        | 128             | 612         | 20.9               |
| Perineum (500 Group).....                   | 35              | 586         | 5.9                |
| Extremities (600 Group).....                | 53              | 1593        | 3.3                |
| Spinal Cord and Column (700 Group).....     | 40              | 463         | 8.6                |
| Therapeutic and Diagnostic (800 Group)..... | 0               | 136         |                    |
| <b>Total Complications.....</b>             | <b>309</b>      | <b>4289</b> | <b>7.2</b>         |

**POSTOPERATIVE CENTRAL NERVOUS SYSTEM MORBIDITY**  
**Anesthetic Agent Administered**

| Agent                   | Headache  | Post Lumbar Puncture |           | Total      | Total Cases | Incidence Per Cent |
|-------------------------|-----------|----------------------|-----------|------------|-------------|--------------------|
|                         |           | Headache             | Backache  |            |             |                    |
| Ether.....              | 36        |                      |           | 36         | 1463        | 2.4                |
| Nitrous Oxide.....      | 6         |                      |           | 6          | 420         | 1.4                |
| Cyclopropane.....       | 6         |                      |           | 6          | 257         | 2.3                |
| Vinethene.....          | 5         |                      |           | 5          | 19          | 26.3               |
| Pentothal.....          | 14        |                      |           | 14         | 482         | 2.9                |
| Procaine.....           |           | 72                   | 22        | 94         | 1053        | 8.9                |
| Metycaine.....          | 2         | 32                   | 3         | 37         | 478         | 7.7                |
| Pontocaine.....         |           | 2                    | 1         | 3          | 89          | 3.4                |
| Nupercaine.....         |           | 3                    | 1         | 4          | 19          | 21.1               |
| Other Barbiturates..... |           |                      |           | 0          | 9           | 0.0                |
| <b>Total.....</b>       | <b>69</b> | <b>109</b>           | <b>27</b> | <b>205</b> | <b>4289</b> | <b>4.8</b>         |

## POSTOPERATIVE RESPIRATORY MORBIDITY

(Chest Surgery excluded)

## ANESTHETIC AGENT ADMINISTERED

| Agent                             | Major Postop. Complication | Minor Postop. Complication | Total Comp. | Total Cases | Incidence, Per Cent |
|-----------------------------------|----------------------------|----------------------------|-------------|-------------|---------------------|
| Ether (not intubated).....        | 5                          | 62                         | 95          | 1446        | 6.6                 |
| Ether (intubated).....            | 8                          | 20                         |             |             |                     |
| Nitrous Oxide.....                | 2                          | 9                          | 11          | 399         | 2.8                 |
| Cyclopropane (not intubated)..... | 1                          | 6                          | 9           | 213         | 4.2                 |
| Cyclopropane (intubated).....     | 1                          | 1                          |             |             |                     |
| Vinethene.....                    |                            | 3                          | 3           | 19          | 15.8                |
| Pentothal.....                    | 1                          | 3                          | 4           | 466         | 0.8                 |
| Other Barbiturates.....           |                            |                            |             | 9           | 0.0                 |
| Procaine (Infiltration).....      | 1                          | 9                          |             |             |                     |
| Procaine (Spinal).....            | 10                         | 49                         | 72          | 1041        | 6.9                 |
| Procaine (Cont. Spinal).....      | 2                          | 1                          |             |             |                     |
| Metycaine (Spinal).....           | 7                          | 17                         | 26          | 476         | 5.5                 |
| Metycaine (Caudal).....           |                            | 2                          |             |             |                     |
| Pontocaine (Spinal).....          | 2                          | 4                          | 6           | 89          | 6.7                 |
| Nupercaine (Spinal).....          |                            | 3                          | 3           | 19          | 15.8                |
| Total.....                        | 40                         | 189                        | 229         | 4177        |                     |

Total Resp. Morbidity..... 5.5

Total Major Complication Incidence..... 0.9

Minor Complication Incidence..... 4.6

Major Postoperative Complications: All pneumonias, lung abscess, empyema, partial or massive pulmonary collapse, and major degrees of obstruction or depression.

Minor Postoperative Complications: Cough, tracheitis, bronchitis, laryngitis, pharyngitis, pleurisy, hiccup, oxygen lack and minor degrees of obstruction or depression.

**POSTOPERATIVE RESPIRATORY MORBIDITY**  
(Chest Surgery Only)  
Agent and Technic

| Agent                              | Major Complications | Total Major Complications | Total Cases | Incidence Per Cent |
|------------------------------------|---------------------|---------------------------|-------------|--------------------|
| Ether (not intubated) .....        | 1                   | 3                         | 17          | 6.3                |
| Ether (intubated) .....            | 2                   |                           |             |                    |
| Nitrous Oxide .....                | 1                   | 1                         | 21          |                    |
| Cyclopropane (not intubated) ..... | 1                   |                           |             |                    |
| Cyclopropane (intubated) .....     | 2                   | 3                         | 44          |                    |
| Pentothal .....                    | 0                   | 0                         | 16          |                    |
| Procaine .....                     | 0                   | 0                         | 12          |                    |
| Metycaine .....                    | 0                   | 0                         | 2           |                    |
| Total .....                        | 7                   | 7                         | 112         |                    |

**MORTALITY STUDIES**

Included are deaths occurring during the patient's stay in the hospital following the administration of an anesthetic agent

| Sex           | Age and Sex |     |       |       |       |       |       |       | Total Deaths | Total Cases | Incidence, Per Cent |
|---------------|-------------|-----|-------|-------|-------|-------|-------|-------|--------------|-------------|---------------------|
|               | 0-1         | 1-9 | 10-19 | 20-29 | 30-39 | 40-49 | 50-59 | 60-69 |              |             |                     |
| Males .....   |             |     |       | 13    | 4     | 1     | 1     |       | 19           | 4210        | 0.45                |
| Females ..... |             |     |       | 1     |       |       |       |       | 1            | 79          |                     |
| Total .....   |             |     |       | 14    | 4     | 1     | 1     |       | 20           | 4289        |                     |

**PHYSICAL STATUS PREOPERATIVELY**

|              | Good | Fair | Poor | Serious | Emergency |      | Morbund | Total |
|--------------|------|------|------|---------|-----------|------|---------|-------|
|              |      |      |      |         | Good      | Poor |         |       |
| Deaths ..... | 5    | 4    | 4    | 1       |           | 2    | 4       | 20    |

## AGENT ADMINISTERED, TECHNIC AND TIME OF DEATH

| Time of Death          | Ether | Cyclo-<br>propane | Pento-<br>thal | Pro-<br>caine<br>(Spinal) | Pro-<br>caine<br>(Infil.) | Mety-<br>caine<br>(Sp.) | Ponto-<br>caine<br>(Sp.) | Total |
|------------------------|-------|-------------------|----------------|---------------------------|---------------------------|-------------------------|--------------------------|-------|
| During Operation ..... |       |                   |                |                           |                           |                         |                          |       |
| Operative Day .....    |       | 2                 |                |                           | 3                         |                         |                          | 5     |
| 1-3 Days Postop. ....  | 1     | 1                 |                | 1                         | 1                         |                         |                          | 4     |
| 4-7 Days Postop. ....  | 1     | 1                 | 2              | 1                         |                           | 1                       |                          | 6     |
| 2nd Week Postop. ....  | 1     |                   |                | 1                         |                           | 1                       | 2                        | 5     |
| 3rd Week Postop. ....  |       |                   |                |                           |                           |                         |                          |       |
| Total .....            | 3     | 4                 | 2              | 3                         | 4                         | 2                       | 2                        | 20    |

## DURATION OF ANESTHESIA

|              | ½ Hr. | 1 Hr. | 1½ Hr. | 2 Hrs. | 3 Hrs. | 4 Hrs. | 5 Hrs. | 6 Hrs. | Total |
|--------------|-------|-------|--------|--------|--------|--------|--------|--------|-------|
| Deaths ..... | 1     | 3     | 4      | 3      | 5      | 2      |        | 2      | 20    |

## DISCUSSION

The Army is one of the oldest and presently the largest institution in the country. As in other great organizations, there is a wealth of facts, recorded in every decade, which must be evaluated and integrated for posterity. The Medical Corps, in particular, shares this burden to fulfill its function of providing the most modern and adequate care for its sick and wounded. Studies on the morbidity and mortality due to anesthetic management and/or surgical treatment in World War I have been reported in a few publications and have been both informative and instructive. The volume of data, anticipated in the present conflict, will tremendously overshadow previous records and, accordingly, an objective and mechanical system, designed to accommodate and integrate an almost infinite amount of data, was much desired. This is now available and, as the results in the report have shown, the modified Hollerith punch card system is readily adaptable to record any amount of anesthetic or surgical data.

The Hollerith punch card system has been accepted as an aid in statistical studies by many industrial concerns, by many departments of anesthesia in leading university and civilian hospitals and by the American Society of Anesthetists. It is used by the Diplomates of the Board of Anesthesiologists and other competent anesthetists, many of whom are serving in the Army. It is an inexpensive method, easy to learn and use and, at the present time, ideally suited for recording and evaluating mass data. Although it is more detailed than the method of Nosworthy (6), it is more inclusive and unlimited in its use. The simplicity of its use has been demonstrated at our posts by the fact that enlisted men can be trained to help with coding and punching during their leisure. Its growing popularity has already been noted



with its use by competent anesthetists at many named and numbered general hospitals (7).

The data reported serve merely to indicate the successful application of the modified Hollerith punch card system at general hospitals and the mass of surgical and anesthetic data that can be compiled. Similar records at other surgical installations can be kept just as easily and as satisfactorily. Their combined total would constitute the most complete surgical record ever tabulated in the world and one which would be particularly adaptable for statistical studies of innumerable surgical and anesthetic data. Such a comprehensive evaluation of facts would not only guide us in the solution of medical problems of future wars but also serve to emphasize today the efficiency and success of the Army Medical Corps in caring for its sick and wounded.

#### SUMMARY AND CONCLUSIONS

A combined statistical report from the anesthesia departments of two Army General Hospitals is reported. In general, the figures indicate the trends in choice of agents, technics, and the numbers of operative procedures actually completed. Because of the relatively small number of cases reported, it is believed that no definite conclusions concerning complications can be drawn.

The method of collecting surgical and anesthetic data by use of a standard code and a punched card is emphasized. The type and completeness of information obtainable is demonstrated.

#### REFERENCES

1. Saklad, M.; Rovenstine, E. A., and Gillespie, N. A.: Interpretations to the Anesthesia Code, by Committee on Records and Statistics of the American Society of Anesthetists, Inc. Mimeographed Pamphlet, 745 Fifth Ave., New York, N. Y.
2. Wangeman, C. P.: An Experiment in the Recording of Surgical and Anesthetic Data in Military Service, *Anesthesiology* 2: 179-185 (March) 1941.
3. Rovenstine, E. A.: A Method of Combining Anesthetic and Surgical Records for Statistical Purposes, *Anesth. & Analg.* 13: 122-128 (May-June) 1934.
4. Tovell, R. M., and Dunn, H. L.: Anesthesia Study Records, *Anesth. & Analg.* 11: 37-41 (Jan.-Feb.) 1932.
5. Saklad, M.: A Method for the Collection and Tabulation of Anesthetic Data, *Anesth. & Analg.* 19: 184-196 (July-Aug.) 1940.
6. Nosworthy, M.: Method of Keeping Anaesthetic Records and Assessing Results, *Brit. J. Anaesth.* 18: 160-179 (July) 1943.
7. Personal Communication. Letters from anesthetists assigned to named and numbered hospitals.
